# Supplementary material
Source: PubMed Central journal article supplement (PMC5748899)
Supplement: ASN.2016101150SupplementaryData1.pdf [file ASN.2016101150SupplementaryData1.pdf]

## **Supplementary data**

### **Complete Methodology**

#### **Study design and population**

This was a phase 2, randomized, multicenter, double-blind, placebo-controlled trial to evaluate the safety and efficacy of allogeneic bone marrow-derived human MSCs (AC607) in patients undergoing cardiac surgery with laboratory evidence of postoperative AKI. We conducted the trial in 27 clinical sites in the United States and Canada in accordance with the International Conference on Harmonization (ICH) Good Clinical Practice (GCP) guidelines and registered on [clinicaltrials.gov](http://clinicaltrials.gov) (NCT01602328). Research teams at each center obtained Institutional Review Board or Ethics Committee approval and signed informed consent from each patient or his or her surrogate decision-maker prior to participation. The first patient was randomized on January 10, 2013 and the study was terminated on March 31, 2014, following a recommendation from the Data Monitoring Committee that enrollment be ceased.

We included adults (>21 years of age) undergoing cardiac surgery utilizing cardiopulmonary bypass (CPB), who had a baseline serum creatinine measured within 30 days before surgery and who developed postoperative AKI. Based on an epidemiologic assessment, the trials design group recommended the AKI definition as a postoperative rise in serum creatinine greater than 0.5 mg/dL from baseline within 24 hours of removal from CPB. The group extended the time window to 48 hours from end of CPB in a protocol amendment dated July 17, 2013. Confirmation of a rise in serum creatinine more than 0.5 mg/dL from baseline was required with at least one additional serum creatinine measurement. We excluded patients with stage 5 chronic kidney disease (CKD) based on pre-surgical eGFR, active cancer or active treatment for cancer (with the exception of squamous cell or basal cell carcinoma of the skin), surgery for thoraco-abdominal aortic aneurysm, presence of a medical condition or

mechanical circulatory assist device (such as intra-aortic balloon pump, ventricular assist device or extracorporeal membrane oxygenation) that would preclude or compromise femoral artery catheter placement, or current or expected receipt of dialysis within 24 hours of enrollment or dosing. All inclusion and exclusion criteria are provided in **e-Table 1**.

We randomized enrolled subjects to receive AC607 ( $2 \times 10^6$  cells/kg body weight) or placebo in a 1:1 ratio using an interactive web-based response system. We stratified randomization by CKD status, defined as an estimated glomerular filtration rate (eGFR)  $<60$  mL/min/1.73m<sup>2</sup>.

We performed laboratory assessments at screening (either prior to or after completion of surgery), daily during the post-operative hospital stay from the day of randomization until discharge, and at 30 days and 90 days after study drug administration. We measured serum creatinine twice-weekly until day 30 post-dosing or return to baseline values, whichever came first, in patients whose serum creatinine failed to return to or below baseline during their hospital stay.

## **Procedures**

We administered AC607 or placebo as a single dose within 48 hours of removal from CPB and 8 hours of AC607 reconstitution, via a femoral artery catheter, over a period of 1 to 3 minutes. The proceduralist positioned the catheter tip in the aorta at the level of T10-T12 with placement confirmed by imaging prior to dosing.

AC607 was manufactured, processed, packaged and labelled by Lonza Walkersville, Inc. (Walkersville, Maryland) from a starting bone marrow material from two donors. Each 20-mL vial of AC607 contained more than 100 million viable human MSC, 10% v/v dimethyl sulfoxide, 5% v/v human serum albumin in PlasmaLyte A, pH 7.4, and was stored frozen at a temperature below  $-130^{\circ}\text{C}$ . After thawing and reconstitution, the final concentration of MSCs

was  $2 \times 10^6$  cells/kg body weight in a total volume of 100 mL. Cell viability and stability data indicated that the cryopreserved product dose contained 120 million cells with 95% viability at 9 months. Furthermore, when tested through the 4F, 70 cm pigtail administration catheter, AC607 retained viability without cell aggregation. We performed all viability and stability studies according to standardized manufacturing practices for stem cells and submitted the results to the United States FDA and Health Canada for review. We ensured maximum viability by maintaining the product dose on refrigerated gel packs during the period between reconstitution and administration. The placebo also contained 10% v/v dimethyl sulfoxide, 5% v/v human serum albumin in PlasmaLyte A, pH 7.4. Clinical trials teams at each institution ensured blinding of investigators, clinical staff and patients by preparation of AC607 or placebo in identical transfer packs before delivery to the patient's location.

### **Study endpoints**

The primary endpoint was the time to recovery of kidney function after post-operative AKI, defined by the time in days from dosing until the first of two post-dosing serum creatinine samples that returned to the patient's baseline level. We did not impute missing serum creatinine concentrations. We considered patients with missing data that was required to establish recovery of kidney function, including deaths and withdrawals, as not recovered during the study and the recovery time was censored at the last creatinine collection during hospitalization. Secondary efficacy endpoints included all-cause mortality or provision of dialysis at 30 and 90 days post study drug administration, all-cause mortality at 30 and 90 days post administration, and proportion of patients who required dialysis during the 30-day evaluation period. Exploratory efficacy endpoints included ICU and hospital lengths of stay, in-hospital mortality, rate of hospital readmissions within 30 days of end of CPB, time to kidney recovery from post-operative AKI using an alternative definition based on return to

the pre-operative serum creatinine level + 0.2 mg/dL with confirmatory measurement, area under the concentration-time curve (AUC) of serum creatinine concentrations above a pre-specified recovery threshold during hospitalization, peak rise in serum creatinine during hospitalization, and kidney function (eGFR) at 6 months and 1 year follow-up.

We performed safety analysis on all patients who underwent cardiac surgery, provided informed consent, and were treated with AC607/placebo. We predominantly assessed safety using treatment-emergent adverse events (TEAEs), serious adverse events (SAEs), vital signs and laboratory values. Adverse events of special interest (AESIs) included injection reactions, *de novo* development of cancer or manifestations of ectopic MSC differentiation.

### **Statistical Analysis**

We performed efficacy analysis following the intention-to-treat principle including all patients who underwent cardiac surgery, provided informed consent, had a documented acute rise in serum creatinine of  $\geq 0.5$  mg/dL from pre-surgical values within 48 hours of removal from CPB, and received AC607 or placebo. We constructed Kaplan-Meier product limit plots, and determined relative hazard (AC607 versus placebo) using proportional hazards (“Cox”) regression with treatment group as a dependent variable. We calculated the difference between treatment groups in proportions using the exact Clopper-Pearson methodology.

The trials design group estimated the sample size based on the relative hazard for recovery of kidney function greater than 1.25. Assuming 12 days to recovery of kidney function in control-treated patients, 150 treated patients would provide 96%, 92% or 85% power if time to recovery of kidney function were reduced to 7.5 days, 8.0 days or 8.5 days, respectively, in AC607-treated patients.

We conducted all statistical analyses using SAS® software version 9.2 or higher (SAS Institute, Cary, NC).

## Supplementary Table 1: Study inclusion and exclusion criteria

### Inclusion Criteria:

- Age  $\geq$  21 years
- Had cardiovascular surgery utilizing cardiopulmonary bypass
- Have a pre-operative (baseline) serum creatinine value collected within 30 days of surgery (if multiple laboratory results are available within this time window, the most recent serum creatinine value prior to surgery to be used to establish the baseline)
- Willing and able to comply with visit schedule and study procedures including posthospitalization discharge follow-up
- Ability to give informed consent or have a legally acceptable representative do so for them
- Have AKI defined as  $\geq$  0.5 mg/dL rise in serum creatinine from baseline within 48 hours of removal from cardiopulmonary bypass

### Exclusion Criteria:

- Active cancer and/or receiving active treatment for cancer, with the exception of squamous cell or basal cell carcinoma of the skin
- Surgery for thoraco-abdominal aortic aneurysm (TAAA)
- Current participation in another interventional drug or device clinical study
- Prisoner or other detainee
- Current medical condition that would preclude or compromise femoral artery catheter placement
- Intra-aortic balloon pump (IABP) in place within 2 hours prior to study catheter placement
- Ventricular assist device (VAD) or extracorporeal membrane oxygenation (ECMO) in place at the time of study catheter placement
- Prior history of solid organ or bone marrow transplant
- Stage 5 CKD (based on a pre-surgical eGFR) or currently on dialysis
- Expected to receive dialysis within 24 hours of enrollment or dosing
- Complication during surgery or post-operatively that, in the opinion of the principal investigator, significantly increased the risk of complications to the subject and therefore precluded dosing the subject
- Pregnant or lactating - women with childbearing potential may be tested for pregnancy at the discretion of the principal investigator.

**Supplementary Table 2 – Mortality data**

| <b>Age</b> | <b>Sex</b> | <b>Type of Operation</b>                     | <b>Postop Dialysis</b> | <b>AKI recovery</b> | <b>Date of Death (Study Day)</b> | <b>In hospital Death</b> | <b>SAE/Cause of Death</b>     | <b>Relatedness to Study</b> |
|------------|------------|----------------------------------------------|------------------------|---------------------|----------------------------------|--------------------------|-------------------------------|-----------------------------|
| AC607      |            |                                              |                        |                     |                                  |                          |                               |                             |
| 69         | Male       | Valve                                        | Yes                    | Yes                 | 143                              | No                       | Multi-organ failure           | Unrelated                   |
| 50         | Male       | Redo valve                                   | No                     | No                  | 10                               | Yes                      | Hemothorax                    | Unrelated                   |
| 50         | Female     | Pulmonary thrombectomy                       | Yes                    | Yes                 | 198                              | No                       | Unknown                       | Unrelated                   |
| 74         | Female     | CABG, Valve                                  | Yes                    | Yes                 | 31                               | Yes                      | Multi-organ failure           | Unrelated                   |
| 62         | Female     | CABG, RV Repair                              | No                     | No                  | 34                               | No                       | Stroke                        | Unrelated                   |
| 81         | Female     | Valve                                        | No                     | No                  | 216                              | No                       | Respiratory failure, GI bleed | Unrelated                   |
| 67         | Male       | CABG                                         | Yes                    | Yes                 | 17                               | Yes                      | Respiratory failure           | Unlikely                    |
| 63         | Male       | Valve                                        | No                     | Yes                 | 219                              | No                       | GI bleed                      | Unrelated                   |
| 83         | Male       | CABG, Aortic dissection repair               | No                     | No                  | 0                                | Yes                      | Cardiogenic shock             | Unrelated                   |
| 62         | Male       | Valve                                        | Yes                    | No                  | 14                               | Yes                      | Cardiorespiratory arrest      | Unrelated                   |
| 84         | Female     | Valve, VSD/PFO closure, RV myomectomy        | No                     | No                  | 7                                | Yes                      | Ischemic bowel                | Unrelated                   |
| 55         | Male       | CABG                                         | No                     | No                  | 1                                | Yes                      | Cardiogenic shock             | Unlikely                    |
| Placebo    |            |                                              |                        |                     |                                  |                          |                               |                             |
| 66         | Male       | Ascending Aorta replacement, coronary repair | No                     | Yes                 | 17                               | Yes                      | Hypoxic brain injury          | Unlikely                    |
| 82         | Male       | CABG                                         | No                     | No                  | 9                                | No                       | Arrhythmia                    | Unrelated                   |
| 66         | Female     | CABG                                         | Yes                    | Yes                 | 15                               | Yes                      | Sepsis                        | Unlikely                    |
| 56         | Male       | CABG                                         | No                     | No                  | 85                               | No                       | Unknown                       | Unlikely                    |
| 63         | Female     | Valve                                        | Yes                    | Yes                 | 20                               | Yes                      | Encephalopathy                | Unknown                     |
| 78         | Male       | Valve                                        | No                     | No                  | 9                                | Yes                      | GI bleed                      | Unrelated                   |

Abbreviations: SAE – serious adverse event



**Supplementary Table 3 – Treatment Emergent Serious Adverse Events (TESAE) up to 90 days post-treatment**

|                                                                  |                            | <b>AC607 (N= 67)</b> | <b>Placebo (N= 68)</b> |
|------------------------------------------------------------------|----------------------------|----------------------|------------------------|
| Number of Subjects with at least one TESAE                       |                            | 41 (61.2%)           | 34 (50.0%)             |
| TESAEs Occurring in $\geq$ 5% of Subjects Within a Single Cohort |                            |                      |                        |
| Cardiac Disorders                                                | Overall                    | 18 (26.9%)           | 19 (27.9%)             |
|                                                                  | Cardiac failure congestive | 3 (4.5%)             | 7 (10.3%)              |
|                                                                  | Atrial fibrillation        | 2 (3.0%)             | 4 (5.9%)               |
|                                                                  | Cardiogenic shock          | 4 (6.0%)             | 1 (1.5%)               |
| Respiratory and Thoracic Disorders                               | Overall                    | 13 (19.4%)           | 9 (13.2%)              |
|                                                                  | Pleural effusion           | 5 (7.5%)             | 3 (4.4%)               |
|                                                                  | Respiratory failure        | 6 (9.0%)             | 2 (2.9%)               |
| Infections                                                       | Overall                    | 12 (17.9%)           | 9 (13.2%)              |
|                                                                  | Pneumonia                  | 4 (6.0%)             | 1 (1.5%)               |
| Renal and Urinary Disorders                                      | Overall                    | 7 (10.4%)            | 6 (8.8%)               |
|                                                                  | Acute renal failure        | 3 (4.5%)             | 4 (5.9%)               |

**Supplementary Table 4 – Vital Signs and Urine Output**

| <b>Parameter</b>                               | <b>Group</b> | <b>Baseline</b> | <b>Day 1</b> | <b>Day 2</b> | <b>Day 3</b> | <b>Day 4</b> | <b>Day 5</b> | <b>Discharge</b> |
|------------------------------------------------|--------------|-----------------|--------------|--------------|--------------|--------------|--------------|------------------|
| Heart Rate<br>(beats/min;<br>mean±SD)          | AC607        | 84.5 ± 14.2     | 81.5 ± 14.5  | 83.2 ± 13.0  | 82.7 ± 16.2  | 87.2 ± 15.2  | 85.3 ± 14.1  | 81.5 ± 12.0      |
|                                                | Placebo      | 82.5 ± 14.3     | 82.3 ± 15.2  | 83.5 ± 14.2  | 80.0 ± 15.0  | 81.0 ± 15.3  | 78.8 ± 11.4  | 79.6 ± 12.4      |
| Systolic Blood Pressure<br>(mmHg; mean±SD)     | AC607        | 116.7 ± 15.8    | 125.8 ± 20.5 | 127.3 ± 20.4 | 127.7 ± 21.5 | 130.3 ± 23.1 | 128.7 ± 23.0 | 123.6 ± 18.5     |
|                                                | Placebo      | 120.1 ± 17.1    | 125.8 ± 19.6 | 122.9 ± 18.2 | 123.3 ± 21.0 | 125.8 ± 17.7 | 125.5 ± 16.8 | 125.2 ± 18.7     |
| Diastolic Blood Pressure<br>(mmHg; mean±SD)    | AC607        | 56.0 ± 9.9      | 59.1 ± 10.4  | 62.6 ± 11.1  | 63.1 ± 12.3  | 64.5 ± 11.3  | 65.9 ± 11.3  | 67.8 ± 10.8      |
|                                                | Placebo      | 57.3 ± 9.6      | 60.5 ± 8.9   | 63.1 ± 9.4   | 64.2 ± 12.5  | 65.4 ± 12.9  | 64.1 ± 12.1  | 69.4 ± 10.3      |
| Respiratory Rate<br>(breaths/min;<br>mean± SD) | AC607        | 18.6 ± 5.6      | 19.3 ± 4.8   | 19.2 ± 4.7   | 18.2 ± 3.6   | 18.6 ± 2.9   | 19.4 ± 3.7   | 18.3 ± 2.4       |
|                                                | Placebo      | 19.1 ± 5.4      | 19.2 ± 4.8   | 19.3 ± 4.5   | 19.0 ± 3.3   | 19.0 ± 2.8   | 19.4 ± 4.0   | 18.4 ± 2.1       |
| Temperature<br>(° Celsius;<br>mean±SD)         | AC607        | 37.0 ± 0.5      | 36.8 ± 0.6   | 36.9 ± 0.6   | 36.9 ± 0.6   | 36.9 ± 0.5   | 36.8 ± 0.7   | 36.6 ± 0.6       |
|                                                | Placebo      | 37.1 ± 0.6      | 37.0 ± 0.7   | 36.8 ± 0.6   | 36.8 ± 0.6   | 36.8 ± 0.5   | 36.9 ± 0.5   | 36.7 ± 0.4       |
| Urine Output<br>(ml/day; mean±SD)              | AC607        | 1582 ± 1209     | 2073 ± 1485  | 2172 ± 1351  | 2235 ± 1531  | 2149 ± 1536  | 1779 ± 1234  | -                |
|                                                | Placebo      | 1698 ± 1529     | 2237 ± 1669  | 2284 ± 1533  | 1964 ± 1185  | 1933 ± 1064  | 1449 ± 831   | -                |

**Supplementary Table 5 – Selected Clinical Laboratory Data**

| Parameter                                                       | AC607 (n=66) |                                        | Placebo (n=68) |                                        | Crude Incidence Rate Ratio |
|-----------------------------------------------------------------|--------------|----------------------------------------|----------------|----------------------------------------|----------------------------|
|                                                                 | # Cases      | Incidence Rate (Cases Per Person-Week) | # Cases        | Incidence Rate (Cases Per Person-Week) |                            |
| ALP $\geq$ 2 x ULN                                              | 28           | 0.165                                  | 55             | 0.307                                  | 0.54                       |
| ALT $\geq$ 3 x ULN                                              | 40           | 0.227                                  | 56             | 0.306                                  | 0.74                       |
| ALT $\geq$ 10 x ULN                                             | 9            | 0.051                                  | 15             | 0.082                                  | 0.62                       |
| AST $\geq$ 3 x ULN                                              | 58           | 0.326                                  | 72             | 0.392                                  | 0.83                       |
| AST $\geq$ 10 x ULN                                             | 18           | 0.101                                  | 22             | 0.120                                  | 0.84                       |
| GGT $\geq$ 3 x ULN                                              | 42           | 0.334                                  | 48             | 0.505                                  | 0.66                       |
| Serum Creatinine $\geq$ 2.0 mg/dL                               | 326          | 1.483                                  | 247            | 1.135                                  | 1.31                       |
| Uric Acid $\geq$ 8.5 mg/dL (females), $\geq$ 10.5 mg/dL (males) | 106          | 0.646                                  | 87             | 0.536                                  | 1.20                       |
| LDH $\geq$ 3 x ULN                                              | 36           | 0.267                                  | 18             | 0.159                                  | 1.68                       |
| BUN > 30 mg/dL                                                  | 400          | 2.347                                  | 360            | 1.980                                  | 1.19                       |

Abbreviations: ALP – alkaline phosphatase; ULN – upper limit of normal; ALT - alanine transaminase; AST – aspartate aminotransferase; GGT - gamma-glutamyl transferase; LDH - lactate dehydrogenase; BUN - blood urea nitrogen
